# Supplementary material
Source: publisher site journal article supplement (https://www.dovepress.com/article/454845)
Supplement: Supplementary file 1 [file get_supplementary_file.php]

# **Supplementary Material**s

Literature search terms used in the PubMed, Embase and Cochrane Library databases.

Supplementary Table 1 Search terms used in the PubMed database

| # | Search term | Number of hits |
| --- | --- | --- |
| 1 | "schizophrenia"[Mesh] OR "schizophrenia"[tiab] OR "schizophrenic"[tiab] | 151,465 |
| 2 | (“negative symptoms”[tiab] OR “deficit”[tiab] OR “PANSS”[tiab] OR “Positive and Negative Syndrome Scale”[tiab] OR “Calgary Depression Scale for Schizophrenia”[tiab] OR “CDSS”[tiab] OR “Scale for the Assessment of Negative Symptoms”[tiab] OR “SANS”[tiab] OR “Clinical Assessment Interview for Negative Symptoms”[tiab] OR “CAINS”[tiab] OR “Brief Negative Symptom Scale”[tiab] OR “BNSS”[tiab] OR “Negative Symptom Assessment-16”[tiab] OR “16 item Negative Symptom Assessment”[tiab] OR “NSA-16”[tiab] OR “NSA16”[tiab] OR “Clinical Global Impression*”[tiab] OR “CGI”[tiab] OR “Extrapyramidal Symptom Rating Scale”[tiab] OR “ESRS”[tiab] OR “avolition”[tiab] OR “amotivation”[tiab] OR "lack of motivation"[tiab] OR “loss of motivation”[tiab] OR “lack of interest”[tiab] OR “loss of interest”[tiab] OR “apathy”[MeSH] OR “apathy” [tiab] OR “anhedonia”[MeSH] OR “anhedoni*”[tiab] OR “alogia”[tiab] OR “poverty of speech”[tiab] OR “impoverished speech”[tiab] OR “laconic speech”[tiab] OR “diminished speech”[tiab] OR “reduced speech”[tiab] OR “lack of speech”[tiab] OR “loss of speech”[tiab] OR “asociality”[tiab] OR “lack of social”[tiab] OR “loss of social”[tiab] OR “reduced social”[tiab] OR “social disinterest”[tiab] OR “social withdrawal”[tiab] OR “affect”[MeSH] OR “motivation”[MeSH] OR “motivation”[tiab] OR “unmotivated”[tiab] OR “lethargy”[MeSH] OR “letharg*”[tiab] OR “apathetic”[tiab] OR “social* isolat*”[tiab] OR “Social isolation”[MeSH] OR (("blunted"[tiab] OR "blunting"[tiab] OR “flat*”[tiab] OR “reduced”[tiab] OR “diminished”[tiab]) AND ("affect"[tiab] OR “affective”[tiab] OR "emotional respons*"[tiab] OR “expression”[tiab]))) | 861,154 |
| 3 | (“quality of life”[tiab] OR “quality of life”[MeSH] OR “functional outcome”[tiab] OR “functional outcomes”[tiab] OR “outcome assessment, health care”[MeSH] OR "psychiatric status rating scales"[Mesh] OR "Psychometrics"[Mesh] OR “performance-based test”[tiab] OR “performance-based measure*”[tiab] OR “performance-based assessment”[tiab] OR “performance test”[tiab] OR “measure of performance”[tiab] OR “performance measure”[tiab] OR “performance assessment”[tiab] OR “assessment of performance”[tiab] OR “outcome measure*”[tiab] OR “patient reported outcome*”[tiab] OR “clinical outcome assessment”[tiab] OR "observer reported outcome*"[tiab] OR “clinician reported outcome*”[tiab] OR “performance-related outcome*”[tiab] OR “functional performance”[tiab] OR “functional status”[tiab] OR “social outcome*”[tiab] OR “psychosocial function*”[tiab] OR “psychosocial outcome*”[tiab] OR “social function*”[tiab] OR “interpersonal function*”[tiab] OR “adaptive function*”[tiab] OR “independent living”[tiab] OR “living skills”[tiab] OR “self-care”[tiab] OR “activities of daily living”[tiab] OR “activities of daily living”[MeSH] OR “everyday living”[tiab] OR “everyday skills”[tiab] OR “work status”[tiab] OR “employment”[tiab] OR “employment”[MeSH] OR “unemployment”[tiab]) | 2,076,096 |
| 4 | (“observational”[tiab] OR “prospective”[tiab] OR “real world”[tiab] OR “cohort”[tiab] OR “longitudinal”[tiab] OR “observational study”[publication type] OR “observational studies as topic”[MeSH] OR “Clinical trial”[tiab] OR “controlled trial”[tiab] OR “randomized trial”[tiab] OR “phase II trial”[tiab] OR “phase 2 trial”[tiab] OR “phase III trial”[tiab] OR “phase 3 trial”[tiab] OR “phase IV trial”[tiab] OR “phase 4 trial”[tiab] OR “controlled study”[tiab] OR “clinical study”[tiab] OR “randomized study”[tiab] OR “phase II study”[tiab] OR “phase 2 study”[tiab] OR “phase III study”[tiab] OR “phase 3 study”[tiab] OR “phase IV study”[tiab] OR “phase 4 study”[tiab] OR "adaptive clinical trial"[Publication Type] OR "clinical trial"[Publication Type] OR "clinical study"[Publication Type] OR "clinical trial, phase ii"[Publication Type] OR "clinical trial, phase iii"[Publication Type] OR "clinical trial, phase iv"[Publication Type] OR "comparative study"[Publication Type] OR "controlled clinical trial"[Publication Type] OR "equivalence trial"[Publication Type] OR "evaluation study"[Publication Type] OR "evaluation studies"[Publication Type] OR "pragmatic clinical trial"[Publication Type] OR "randomized controlled trial"[Publication Type] OR “double blind method”[MeSH] OR "Clinical Trials as Topic"[Mesh]) | 4,375,430 |
| 5 | #1 AND #2 | 26,168 |
| 6 | #5 AND #3 | 10,113 |
| 7 | #6 AND #4 | 4,763 |
| 8 | Limit #7 to published in English | 4,520 |
| 9 | Limit #7 to published in English in the previous 10 years | 1,909 |

Searches were performed on June 29, 2021

Supplementary Table 2 Search terms used in the Cochrane Library database

| # | Search terms | Hits |
| --- | --- | --- |
| Schizophrenia terms | |  |
| 1 | MeSH descriptor: [Schizophrenia] explode all trees | 7,680 |
| 2 | ("schizophrenia" OR "schizophrenic"):ti,ab,kw | 18,055 |
| 3 | #1 OR #2 | 18,057 |
| Negative symptoms terms | |  |
| 4 | MeSH descriptor: [apathy] explode all trees | 77 |
| 5 | MeSH descriptor: [anhedonia] explode all trees | 65 |
| 6 | MeSH descriptor: [affect] explode all trees | 4,623 |
| 7 | MeSH descriptor: [motivation] explode all trees | 8,490 |
| 8 | MeSH descriptor: [lethargy] explode all trees | 9 |
| 9 | MeSH descriptor: [social isolation] explode all trees | 305 |
| 10 | (“negative symptoms” OR “deficit” OR PANSS OR “Positive and Negative Syndrome Scale” OR “Calgary Depression Scale for Schizophrenia” OR CDSS OR “Scale for the Assessment of Negative Symptoms” OR “SANS” OR “Clinical Assessment Interview for Negative Symptoms” OR “CAINS” OR “Brief Negative Symptom Scale” OR “BNSS” OR “Negative Symptom Assessment-16” OR “16 item Negative Symptom Assessment” OR “NSA-16” OR “NSA16” OR “Clinical Global Impression*” OR “CGI” OR “Extrapyramidal Symptom Rating Scale” OR “ESRS” OR “avolition” OR “amotivation” OR "lack of motivation" OR “loss of motivation” OR “lack of interest” OR “loss of interest” OR “apathy” OR “anhedoni*” OR “alogia” OR “poverty of speech” OR “impoverished speech” OR “laconic speech” OR “diminished speech” OR “reduced speech” OR “lack of speech” OR “loss of speech” OR “asociality” OR “lack of social” OR “loss of social” OR “reduced social” OR “social disinterest” OR “social withdrawal” OR “motivation” OR “unmotivated” OR “letharg*” OR “apathetic” OR “social* isolat*” OR (("blunted" OR "blunting" OR “flat*” OR “reduced” OR “diminished”) AND ("affect" OR “affective” OR "emotional respons*" OR “expression”))):ti,ab,kw | 109,169 |
| 11 | #4 OR #5 OR #6 OR #7 OR #8 OR #9 OR #10 | 115,438 |
| Quality of life and functional outcomes terms | |  |
| 12 | MeSH descriptor: [quality of life] explode all trees | 25,345 |
| 13 | MeSH descriptor: [outcome assessment, health care] explode all trees | 151,079 |
| 14 | MeSH descriptor: [psychiatric status rating scales] explode all trees | 10,664 |
| 15 | MeSH descriptor: [psychometrics] explode all trees | 2,856 |
| 16 | MeSH descriptor: [activities of daily living] explode all trees | 9,606 |
| 17 | MeSH descriptor: [employment] explode all trees | 1,939 |
| 18 | (“quality of life” OR “functional outcome” OR “functional outcomes” OR “performance-based test” OR “performance-based measure*” OR “performance-based assessment” OR “performance test” OR “measure of performance” OR “performance measure” OR “performance assessment” OR “assessment of performance” OR “outcome measure*” OR “patient reported outcome*” OR “clinical outcome assessment” OR "observer reported outcome*" OR “clinician reported outcome*” OR “performance-related outcome*” OR “functional performance” OR “functional status” OR “social outcome*” OR “psychosocial function*” OR “psychosocial outcome*” OR “social function*” OR “interpersonal function*” OR “adaptive function*” OR “independent living” OR “living skills” OR “self-care” OR “activities of daily living” OR “everyday living” OR “everyday skills” OR “work status” OR “employment” OR “unemployment”):ti,ab,kw | 232,605 |
| 19 | #12 OR #13 OR #14 OR #15 OR #16 OR #17 OR #18 | 354,376 |
| Terms to restrict searches to clinical trials or observational studies | |  |
| 20 | MeSH descriptor: [observational studies as topic] explode all trees | 57 |
| 21 | MeSH descriptor: [clinical trials as topic] explode all trees | 48,287 |
| 22 | MeSH descriptor: [double blind method] explode all trees | 141,211 |
| 23 | (“observational study” OR "adaptive clinical trial" OR "clinical trial" OR "clinical study" OR "clinical trial, phase ii" OR "clinical trial, phase iii" OR "clinical trial, phase iv" OR "comparative study" OR "controlled clinical trial" OR "equivalence trial" OR "evaluation study" OR "evaluation studies" OR "pragmatic clinical trial" OR "randomized controlled trial"):pt | 599,618 |
| 24 | (“observational” OR “prospective” OR “real world” OR “cohort” OR “longitudinal” OR “Clinical trial” OR “controlled trial” OR “randomized trial” OR “phase II trial” OR “phase 2 trial” OR “phase III trial” OR “phase 3 trial” OR “phase IV trial” OR “phase 4 trial” OR “controlled study” OR “clinical study” OR “randomized study” OR “phase II study” OR “phase 2 study” OR “phase III study” OR “phase 3 study” OR “phase IV study” OR “phase 4 study”):ti,ab,kw | 1,094,999 |
| 25 | #20 OR #21 OR #22 OR #23 OR #24 | 1,280,286 |
| 26 | #3 AND #11 | 7,292 |
| 27 | #26 AND #19 | 3,500 |
| 28 | #27 AND #25 | 3,083 |
| 29 | Limit #28 to published in previous 10 years | 1,973 |

Searches were performed on June 29, 2021.

Supplementary Table 3 Search terms used in the Embase database

| # | Search term | Number of hits |
| --- | --- | --- |
| 1 | 'schizophrenia'/exp OR 'schizophrenia':ab,ti OR 'schizophrenic':ab,ti | 225,124 |
| 2 | 'negative symptoms':ab,ti OR 'deficit':ab,ti OR 'calgary depression scale for schizophrenia':ab,ti OR 'cdss':ab,ti OR 'scale for the assessment of negative symptoms':ab,ti OR 'sans':ab,ti OR 'clinical assessment interview for negative symptoms':ab,ti OR 'cains':ab,ti OR 'brief negative symptom scale':ab,ti OR 'bnss':ab,ti OR '16 item negative symptom assessment':ab,ti OR 'negative symptoms assessment 16':ab,ti OR 'nsa16':ab,ti OR 'nsa-16':ab,ti OR 'clinical global impression*':ab,ti OR 'cgi':ab,ti OR 'extrapyramidal symptom rating scale':ab,ti OR 'esrs':ab,ti OR 'avolition':ab,ti OR 'amotivation':ab,ti OR 'motivation'/exp OR 'motivation':ab,ti OR 'unmotivated':ab,ti OR 'lack of interest':ab,ti OR 'loss of interest':ab,ti OR 'lethargy'/exp OR 'letharg*':ab,ti OR 'apathy'/exp OR 'apathy':ab,ti OR 'apathetic':ab,ti OR 'anhedonia'/exp OR 'anhedoni*':ab,ti OR 'alogia':ab,ti OR 'poverty of speech':ab,ti OR 'impoverished speech':ab,ti OR 'laconic speech':ab,ti OR 'diminished speech':ab,ti OR 'reduced speech':ab,ti OR 'lack of speech':ab,ti OR 'loss of speech':ab,ti OR 'asociality':ab,ti OR 'lack of social':ab,ti OR 'loss of social':ab,ti OR 'social* isolat*':ab,ti OR 'social isolation'/exp OR 'reduced social':ab,ti OR 'social disinterest':ab,ti OR 'social withdrawal':ab,ti OR 'affect'/exp OR (('blunt*' OR 'flat*' OR 'reduced' OR 'diminished') AND ('affect':ab,ti OR 'affective':ab,ti OR 'emotional response':ab,ti OR 'expression':ab,ti)) OR (positive:ab,ti AND 'negative syndrome scale':ab,ti) OR 'panss':ab,ti | 1,126,858 |
| 3 | 'quality of life'/exp OR 'quality of life':ab,ti OR 'functional outcome*':ab,ti OR 'outcome assessment'/exp OR 'psychological rating scale'/exp OR 'psychometry'/exp OR 'performance-based test':ab,ti OR 'performance-based measure*':ab,ti OR 'performance-based assessment':ab,ti OR 'performance test':ab,ti OR 'measure of performance':ab,ti OR 'performance measure':ab,ti OR 'performance assessment':ab,ti OR 'assessment of performance':ab,ti OR 'outcome measure*':ab,ti OR 'patient reported outcome*':ab,ti OR 'clinical outcome assessment':ab,ti OR 'observer reported outcome*':ab,ti OR 'clinician reported outcome*':ab,ti OR 'performance related outcome*':ab,ti OR 'functional performance':ab,ti OR 'functional status':ab,ti OR 'social outcome*':ab,ti OR 'psychosocial function*':ab,ti OR 'psychosocial outcome*':ab,ti OR 'social function*':ab,ti OR 'interpersonal function*':ab,ti OR 'adaptive function*':ab,ti OR 'independent living':ab,ti OR 'living skills':ab,ti OR 'self care':ab,ti OR 'activities of daily living':ab,ti OR 'activities of daily living'/exp OR 'everyday living':ab,ti OR 'everyday skills':ab,ti OR 'work status':ab,ti OR 'employment':ab,ti OR 'employment'/exp OR 'unemployment':ab,ti | 1,840,503 |
| 4 | 'observational':ab,ti OR 'prospective':ab,ti OR 'real world':ab,ti OR 'cohort':ab,ti OR 'longitudinal':ab,ti OR 'observational study'/exp OR 'prospective study'/exp OR 'longitudinal study'/exp OR 'clinical trial':ab,ti OR 'controlled trial':ab,ti OR 'randomized trial':ab,ti OR 'phase ii trial':ab,ti OR 'phase iii trial':ab,ti OR 'phase 2 trial':ab,ti OR 'phase 3 trial':ab,ti OR 'phase iv trial':ab,ti OR 'phase 4 trial':ab,ti OR 'controlled study':ab,ti OR 'clinical study':ab,ti OR 'randomized study':ab,ti OR 'phase ii study':ab,ti OR 'phase 2 study':ab,ti OR 'phase iii study':ab,ti OR 'phase 3 study':ab,ti OR 'phase iv study':ab,ti OR 'phase 4 study':ab,ti OR 'adaptive clinical trial'/exp OR 'clinical trial'/exp OR 'phase 2 clinical trial'/exp OR 'phase 3 clinical trial'/exp OR 'clinical article'/exp OR 'phase 4 clinical trial'/exp OR 'comparative study'/exp OR 'controlled clinical trial'/exp OR 'equivalence trial'/exp OR 'evaluation study'/exp OR 'pragmatic trial'/exp OR 'randomized controlled trial'/exp OR 'double blind procedure'/exp | 7,325,135 |
| 5 | #1 AND #2 | 41,505 |
| 6 | #5 AND #3 | 9,702 |
| 7 | #6 AND #4 | 4,822 |
| 8 | Limit #7 to published in English | 4,580 |
| 9 | Limit #7 to published in English in the last 10 years | 3,149 |
| 10 | #9 NOT 'conference abstract':it | 2,030 |
| 11 | #10 NOT [medline]/lim | 415 |

Searches were run on June 29, 2021.

Supplementary Table 4 Terminology and threshold levels used to define the presence of negative symptoms

| Study | Study number | NSS term used | NSS definition/inclusion criteria |
| --- | --- | --- | --- |
| Beck et al. 2013[[1]](#endnote-1) (United States) | NR | Negative symptoms classified as either deficit or non-deficit | Deficit syndrome defined according to Proxy for the Deficit Syndrome |
| Bryl et al. 2020[[2]](#endnote-2) (United States) | NR | Negative symptoms | Defined as “presence of negative symptoms”, no threshold mentioned |
| Buchanan et al. 2012[[3]](#endnote-3) (Multinational) | NCT00212836 NCT00265343 NCT00145496 NCT00174265 | Persistent negative symptoms | Score ≥20 on the PANSS negative symptom subscale with scores of ≥4 on ≥3 of the 7 PANSS items of the negative symptom factor (blunted affect, emotional withdrawal, poor rapport, passive social withdrawal, lack of spontaneity, motor retardation, active social avoidance) of Marder et al.1997[[4]](#endnote-4) |
| Burgarski-Kirola et al. 2017[[5]](#endnote-5) (Multinational) | NCT01192906 and NCT01192867 | Persistent predominant negative symptoms | Score ≥40 on the sum of the 14 PANSS, negative and disorganized thought factor items in addition to score ≤22 on the positive symptom factor items |
| Dunayevich et al. 2017[[6]](#endnote-6) (Multinational) | NCT01568216 and NCT01568229 | Prominent negative symptoms | Score ≥20 on the PANSS NSFS (Marder), with score of ≥4 on at least two of the following items: N1, N2, N3, N4, or N6 |
| Edgar et al. 2014[[7]](#endnote-7) (Multinational) | NCT00616798 | Prominent negative (or disorganized thought) symptoms | Score ≥40 (or 26 based on 0–6 item scoring) on sum of 14 PANSS negative and disorganized thought items, plus score ≤28 (or 20 based on 0–6 item scoring) on sum of 8 positive PANSS factor items (P1, P3, P5, P6, N7, G1, G9, G12), plus score on the items P1, P3, P6 and G9 required to be such that ≤2 items could have a score of 4 (or 3 based on 0–6 item scoring); all items also required to score <5 (or 4 based on 0–6 item scoring) |
| Rofail et al. 2016[[8]](#endnote-8) (Multinational) | NCT00616798 | Prominent negative or disorganized thought symptoms | Score ≥40 (or 26 based on 0–6 item scoring) on sum of the 14 PANSS negative and disorganized thought items, plus score ≤28 (or 20 based on 0–6 item scoring on sum of the 8 positive PANSS factor items (P1, P3, P5, P6, N7, G1, G9, G12); plus score of the items P1, P3, P6 and G9 required to be such that ≤2 items could have a score of 4 (or 3 based on 0–6 item scoring); and all items also required to score <5 (or 4 based on 0–6 item scoring) |
| Umbricht et al. 2014[[9]](#endnote-9) (Multinational) | NCT00616798 | Predominant negative symptoms | Score ≥40 (or 26 based on 0–6 item scoring) on sum of the 14 PANSS negative and disorganized thought items, plus score ≤28 (or 20 based on 0–6 item scoring on sum of the 8 positive PANSS factor items (P1, P3, P5, P6, N7, G1, G9, G12); plus score of items of P1, P3, P6 and G9 required to be such that ≤2 items could have a score of 4 (or 3 based on 0–6 item scoring); and all items also required to score <5 (or 4 based on 0–6 item scoring) |
| Fleischhacker et al. 2019[[10]](#endnote-10) (Multinational) | 2012-005485-36 | Persistent predominant negative symptoms (for ≥6 months) | Score ≥24 on PANSS-NSFS (Marder), plus score ≥4 on ≥2 of 3 PANSS negative symptom items (blunted affect, passive/apathetic social withdrawal, lack of spontaneity/flow of conversation) |
| Nemeth et al. 2017[[11]](#endnote-11) (Multinational) | 2012-005485-36 | Predominant negative symptoms (for ≥6 months) | Score ≥24 on PANSS-NSFS (Marder), plus score ≥4 on ≥2 of 3 PANSS negative symptom items (blunted affect, passive/apathetic social withdrawal, lack of spontaneity/flow of conversation) |
| Hasan et al. 2017[[12]](#endnote-12)34 (Germany) | NCT00783120 | Predominant negative symptoms | Score >20 on PANSS negative symptom subscale, with score ≥4 on ≥1 item from items N1-N7 plus no reduction of ≥10% in PANSS negative subscore in the 2 weeks preceding intervention |
| Wobrock et al. 2015[[13]](#endnote-13)35 (Germany) | NCT00783120 | Predominant negative symptoms | Score >20 on PANSS negative symptom subscale, with score of ≥4 on ≥1 item from items N1-N7 plus no reduction of ≥10% in PANSS negative subscore in the 2 weeks preceding intervention |
| Hill et al. 2011[[14]](#endnote-14)36 (United States) | NR | Residual negative symptoms | Score ≥3 on ≥1 SANS global assessment subscales (except attention global subscale) |
| Hirayasu et al. 2016[[15]](#endnote-15) (Japan) | JapicCTI-111627 | Predominant negative symptoms | Score ≥40 on sum of 14 PANSS NSFS negative and disorganized thought items plus score of ≥4 based on CGI–Severity of illness (CGI-S) negative symptoms |
| Kane et al. 2012[[16]](#endnote-16) (United States) | NCT00772005 | Negative symptoms | Score ≥15 on PANSS negative symptom subscale (protocol amended during enrolment to require minimum negative symptom score; results presented are for total patients before and after protocol amendment) |
| Kaphzan et al. 2014[[17]](#endnote-17) (Israel) | NCT00192855 | Predominant negative symptoms | Score ≥20 on PANSS negative subscale (plus total PANSS score of ≥65) |
| Kayo et al. 2020[[18]](#endnote-18) (Brazil) | NCT00791882 | Predominant negative symptoms | Score ≥16 on PANSS negative subscale |
| Klingberg et al. 2011[[19]](#endnote-19) (Germany) | ISRCTN 25455020 | ≥1 moderate negative symptom | ≥1 moderate negative symptom defined according to a modified negative syndrome (MNS) factor of the PANSS, (PANSS-MNS score ≥10) |
| Klingberg et al. 2012[[20]](#endnote-20) (Germany) | ISRCTN 25455020 | ≥1 moderate negative symptom | ≥1 moderate negative symptom as operationalized by a modified negative syndrome (MNS) factor of the PANSS), i.e., a PANSS-MNS score of ≥10. |
| Levkovitz et al. 2011[[21]](#endnote-21) (Israel) | NR | Predominant negative symptoms | Score ≥21 on PANSS negative subscale plus score ≤24 on PANSS positive subscale |
| Liu et al. 2012[[22]](#endnote-22) (Taiwan) | NA | Marked blunting | Three subtypes used (marked blunting, remitted or persistent hallucination/delusional) authors used Generalized Association Plots that used PANSS scores plus analysis of each symptom score in PANSS at 6 months; review considered only findings in marked blunting group |
| Mairs et al. 2011[[23]](#endnote-23) (United Kingdom) | NR | Negative symptoms | Score ≥25 on SANS |
| Novick et al. 2017[[24]](#endnote-24) (Multinational) | NA | Moderate to severe symptoms or high level of negative symptoms or prominent negative symptoms (all terms used in manuscript) | Score ≥4 on CGI-SCH negative symptoms plus low level of positive symptoms defined as score of ≤3 on CGI-SCH positive symptoms |
| Palm et al. 2016[[25]](#endnote-25) (Germany) | NCT01378078 | Predominant negative symptoms | Presence of negative symptoms based on judgement of two experienced psychiatrists |
| Priebe et al. 2016a[[26]](#endnote-26) (United Kingdom) | ISRCTN842165587 | Negative symptoms | Score ≥18 on PANSS negative symptom subscale |
| Priebe et al. 2016b[[27]](#endnote-27) (United Kingdom) | ISRCTN842165587 | Negative symptoms | Score ≥18 on PANSS negative symptom subscale |
| Savill et al. 2016[[28]](#endnote-28) (United Kingdom) | ICTRN842165587 | At least moderate negative symptoms | Score ≥18 on PANSS negative symptom subscale (authors report using PANSS Marder factor for the PANSS negative scale) |
| Rabinowitz et al. 2013[[29]](#endnote-29) (United States) | NR | Prominent negative symptoms | Score ≥4 on ≥3 items, or score ≥5 on ≥2 items on PANSS negative subscale |
| Rabinowitz et al. 2019[[30]](#endnote-30) (Multinational) | NR | Negative symptoms | Score ≥20 on PANSS negative symptom subscale |
| Rohricht et al. 2011[[31]](#endnote-31) (United Kingdom) | NR | Significant level of negative symptoms at baseline | Score ≥21 on PANSS negative symptom subscale or score ≥6 on one out of three core items: emotional withdrawal, motor retardation, or blunted affect |
| Schaefer et al. 2020[[32]](#endnote-32) (Germany) | NCT00148616 | Negative symptoms | Score ≥20 on PANSS negative symptom subscale |
| Schoemaker et al. 2014[[33]](#endnote-33) (Multinational) | NCT00725075 | Predominant persistent negative symptoms | Score of ≥4 on ≥3 of the following PANSS items at screening: N1, N2, N3, N4, N6, G7 or G16; plus an overall score of >20 on the listed items plus a score of ≥5 on <2 of the positive subscale items: P1, P3, P4, P5, or P6 plus score <20 on PANSS positive subscale |
| Shoja Shafti et al. 2016[[34]](#endnote-34) (Iran) | NR | Negative symptoms; high negative symptoms score | >20% of total SANS ≥24 plus low extrapyramidal symptom score defined as <25% of total Simpson Angus Scale; ≤10 |
| Stauffer et al. 2013[[35]](#endnote-35) (Multinational) | NR | Prominent negative symptoms | Score ≥4 on ≥3 items or score ≥5 on ≥2 items on the PANSS negative subscale (Marder) plus GAF score ≤60 |
| Sum et al. 2018[[36]](#endnote-36) (Singapore) | NR | Deficit syndrome confirmed by a team of psychiatrists; negative symptoms for ≥1 year | Based on the Proxy for the Deficit Syndrome criteria, which is in turn based on PANSS |
| Valiengo et al. 2020[[37]](#endnote-37) (Brazil) | NCT02535676 | Prominent negative symptoms | Score ≥20 on PANSS negative symptoms subscale |
| Walling et al. 2016[[38]](#endnote-38) (Multinational) | NCT01488929 | Negative symptoms | Score >20 on PANSS negative symptoms subscale |

FSNS, factor score for negative symptoms; MNS, modified negative syndrome; NR, not reported; NSS, negative symptoms of schizophrenia; PANSS, Positive and Negative Syndrome Scale

# **References**

1. Beck AT, Grant PM, Huh GA, Perivoliotis D, Chang NA. Dysfunctional attitudes and expectancies in deficit syndrome schizophrenia. Schizophr Bull. 2013;39:43–51 [↑](#endnote-ref-1)
2. Bryl K, Bradt J, Cechnicki A, Fisher K, Sossin KM, Goodill S. The role of dance/movement therapy in the treatment of negative symptoms in schizophrenia: a mixed methods pilot study. J Ment Health. 2020 13:1–11 [↑](#endnote-ref-2)
3. Buchanan RW, Panagides J, Zhao J, Phiri P, den Hollander W, Ha X, Kouassi A, Alphs L, Schooler N, Szegedi A, Cazorla P. Asenapine versus olanzapine in people with persistent negative symptoms of schizophrenia. J Clin Psychopharmacol. 2012;32:36–45 [↑](#endnote-ref-3)
4. Marder SR, Davis JM, Chouinard G. The effects of risperidone on the five dimensions of schizophrenia derived by factor analysis: combined results of the North American trials. J Clin Psychiatry. 1997;58:538–546 [↑](#endnote-ref-4)
5. Bugarski-Kirola D, Blaettler T, Arango C, Fleischhacker WW, Garibaldi G, Wang A, Dixon M, Bressan RA, Nasrallah H, Lawrie S, Napieralski J, Ochi-Lohmann T, Reid C, Marder SR. Bitopertin in Negative Symptoms of Schizophrenia-Results From the Phase III FlashLyte and DayLyte Studies. Biol Psychiatry. 2017;82:8–16 [↑](#endnote-ref-5)
6. Dunayevich E, Buchanan RW, Chen CY, Yang J, Nilsen J, Dietrich JM, Sun H, Marder S. Efficacy and safety of the glycine transporter type-1 inhibitor AMG 747 for the treatment of negative symptoms associated with schizophrenia. Schizophr Res. 2017;182:90–97 [↑](#endnote-ref-6)
7. Edgar CJ, Blaettler T, Bugarski-Kirola D, Le Scouiller S, Garibaldi GM, Marder SR. Reliability, validity and ability to detect change of the PANSS negative symptom factor score in outpatients with schizophrenia on select antipsychotics and with prominent negative or disorganized thought symptoms. Psychiatry Res. 2014;218:219–224 [↑](#endnote-ref-7)
8. Rofail D, Regnault A, le Scouiller S, Berardo CG, Umbricht D, Fitzpatrick R. Health-related quality of life in patients with prominent negative symptoms: results from a multicenter randomized Phase II trial on bitopertin. Qual Life Res. 2016;25:201–211 [↑](#endnote-ref-8)
9. Umbricht D, Alberati D, Martin-Facklam M, Borroni E, Youssef EA, Ostland M, Wallace TL, Knoflach F, Dorflinger E, Wettstein JG, Bausch A, Garibaldi G, Santarelli L. Effect of bitopertin, a glycine reuptake inhibitor, on negative symptoms of schizophrenia: a randomized, double-blind, proof-of-concept study. JAMA Psychiatry. 2014;71:637–646 [↑](#endnote-ref-9)
10. Fleischhacker W, Galderisi S, Laszlovszky I, Szatmári B, Barabássy Á, Acsai K, Szalai E, Harsányi J, Earley W, Patel M, Németh G. The efficacy of cariprazine in negative symptoms of schizophrenia: Post hoc analyses of PANSS individual items and PANSS-derived factors. Eur Psychiatry. 2019;58:1–9 [↑](#endnote-ref-10)
11. Németh G, Laszlovszky I, Czobor P, Szalai E, Szatmári B, Harsányi J, Barabássy Á, Debelle M, Durgam S, Bitter I, Marder S, Fleischhacker WW. Cariprazine versus risperidone monotherapy for treatment of predominant negative symptoms in patients with schizophrenia: a randomised, double-blind, controlled trial. Lancet. 2017;389:1103–1113 [↑](#endnote-ref-11)
12. Hasan A, Wobrock T, Guse B, Langguth B, Landgrebe M, Eichhammer P, Frank E, Cordes J, Wölwer W, Musso F, Winterer G, Gaebel W, Hajak G, Ohmann C, Verde PE, Rietschel M, Ahmed R, Honer WG, Dechent P, Malchow B, Castro MFU, Dwyer D, Cabral C, Kreuzer PM, Poeppl TB, Schneider-Axmann T, Falkai P, Koutsouleris N. Structural brain changes are associated with response of negative symptoms to prefrontal repetitive transcranial magnetic stimulation in patients with schizophrenia. Mol Psychiatry. 2017;22:857–864 [↑](#endnote-ref-12)
13. Wobrock T, Guse B, Cordes J, Wölwer W, Winterer G, Gaebel W, Langguth B, Landgrebe M, Eichhammer P, Frank E, Hajak G, Ohmann C, Verde PE, Rietschel M, Ahmed R, Honer WG, Malchow B, Schneider-Axmann T, Falkai P, Hasan A. Left prefrontal high-frequency repetitive transcranial magnetic stimulation for the treatment of schizophrenia with predominant negative symptoms: a sham-controlled, randomized multicenter trial. Biol Psychiatry. 2015;77:979–988 [↑](#endnote-ref-13)
14. Hill M, Shannahan K, Jasinski S, Macklin EA, Raeke L, Roffman JL, Goff DC. Folate supplementation in schizophrenia: a possible role for MTHFR genotype. Schizophr Res. 2011;127(1-3):41–45 [↑](#endnote-ref-14)
15. Hirayasu Y, Sato S, Takahashi H, Iida S, Shuto N, Yoshida S, Funatogawa T, Yamada T, Higuchi T. A double-blind randomized study assessing safety and efficacy following one-year adjunctive treatment with bitopertin, a glycine reuptake inhibitor, in Japanese patients with schizophrenia. BMC Psychiatry. 2016;16:66 [↑](#endnote-ref-15)
16. Kane JM, Yang R, Youakim JM. Adjunctive armodafinil for negative symptoms in adults with schizophrenia: a double-blind, placebo-controlled study. Schizophr Res. 2012;135(1-3):116–122 [↑](#endnote-ref-16)
17. Kaphzan H, Ben-Shachar D, Klein E. Entacapone augmentation of antipsychotic treatment in schizophrenic patients with negative symptoms; a double-blind placebo-controlled study. Int J Neuropsychopharmacol. 2014;17:337–340 [↑](#endnote-ref-17)
18. Kayo M, Scemes S, Savoia MG, Bichuette A, Abreu AC, da Silva EP, Baria P, Piovaccari V, Petreche B, Bressan RA, Gadelha A, Elkis H. A randomized controlled trial of social skills training for patients with treatment-resistant schizophrenia with predominantly negative symptoms. Psychiatry Res. 2020;287:112914 [↑](#endnote-ref-18)
19. Klingberg S, Wölwer W, Engel C, Wittorf A, Herrlich J, Meisner C, Buchkremer G, Wiedemann G. Negative symptoms of schizophrenia as primary target of cognitive behavioral therapy: results of the randomized clinical TONES study. Schizophr Bull. 2011;37 Suppl 2:S98–110 [↑](#endnote-ref-19)
20. Klingberg S, Herrlich J, Wiedemann G, Wölwer W, Meisner C, Engel C, Jakobi-Malterre UE, Buchkremer G, Wittorf A. Adverse effects of cognitive behavioral therapy and cognitive remediation in schizophrenia: results of the treatment of negative symptoms study. J Nerv Ment Dis. 2012;200:569–576 [↑](#endnote-ref-20)
21. Levkovitz Y, Rabany L, Harel EV, Zangen A. Deep transcranial magnetic stimulation add-on for treatment of negative symptoms and cognitive deficits of schizophrenia: a feasibility study. Int J Neuropsychopharmacol. 2011;14:991–996 [↑](#endnote-ref-21)
22. Liu CC, Chen CH, Hwu HG, Shiu SY, Hua MS, Chen CH, Hwang TJ, Liu CM, Hsieh MH, Liu SK, Chen WJ. Medium-term course and outcome of schizophrenia depicted by the sixth-month subtype after an acute episode. J Formos Med Assoc. 2012;111:265–274 [↑](#endnote-ref-22)
23. Mairs H, Lovell K, Campbell M, Keeley P. Development and pilot investigation of behavioral activation for negative symptoms. Behav Modif. 2011;35:486–506 [↑](#endnote-ref-23)
24. Novick D, Montgomery W, Treuer T, Moneta MV, Haro JM. Real-world Effectiveness of Antipsychotics for the Treatment of Negative Symptoms in Patients with Schizophrenia with Predominantly Negative Symptoms. Pharmacopsychiatry. 2017;50:56–63 [↑](#endnote-ref-24)
25. Palm U, Keeser D, Hasan A, Kupka MJ, Blautzik J, Sarubin N, Kaymakanova F, Unger I, Falkai P, Meindl T, Ertl-Wagner B, Padberg F. Prefrontal Transcranial Direct Current Stimulation for Treatment of Schizophrenia With Predominant Negative Symptoms: A Double-Blind, Sham-Controlled Proof-of-Concept Study. Schizophr Bull. 2016;42:1253–1261 [↑](#endnote-ref-25)
26. Priebe S, Savill M, Wykes T, Bentall RP, Reininghaus U, Lauber C, Bremner S, Eldridge S, Röhricht F. Effectiveness of group body psychotherapy for negative symptoms of schizophrenia: multicentre randomised controlled trial. Br J Psychiatry. 2016;209:54–61 [↑](#endnote-ref-26)
27. Priebe S, Savill M, Wykes T, Bentall R, Lauber C, Reininghaus U, McCrone P, Mosweu I, Bremner S, Eldridge S, Röhricht F; NESS team. Clinical effectiveness and cost-effectiveness of body psychotherapy in the treatment of negative symptoms of schizophrenia: a multicentre randomised controlled trial. Health Technol Assess. 2016;20(11):vii-xxiii, 1–100. [↑](#endnote-ref-27)
28. Savill M, Orfanos S, Reininghaus U, Wykes T, Bentall R, Priebe S. The relationship between experiential deficits of negative symptoms and subjective quality of life in schizophrenia. Schizophr Res. 2016;176:387–391 [↑](#endnote-ref-28)
29. Rabinowitz J, Berardo CG, Bugarski-Kirola D, Marder S. Association of prominent positive and prominent negative symptoms and functional health, well-being, healthcare-related quality of life and family burden: a CATIE analysis. Schizophr Res. 2013;150:339–342 [↑](#endnote-ref-29)
30. Rabinowitz J, Badescu S, Palamarchuk P, Filyk V, Voloshchuk A, Rud V, Melnyk E, Skrypnikov A, Davidson M, Saoud J, Luthringer R. Personal and social adjustment effects of roluperidone in patients with schizophrenia and negative symptoms: Results from an exploratory outcome of a randomized placebo-controlled trial. Schizophr Res. 2019;211:103–104 [↑](#endnote-ref-30)
31. Röhricht F, Papadopoulos, Holden S, Clarke T, Priebe S. Therapeutic processes and clinical outcomes of body psychotherapy in chronic schizophrenia – An open clinical trial,The Arts in Psychotherapy. 2011;38:196–203 [↑](#endnote-ref-31)
32. Schaefer M, Sarkar S, Theophil I, Leopold K, Heinz A, Gallinat J. Acute and Long-term Memantine Add-on Treatment to Risperidone Improves Cognitive Dysfunction in Patients with Acute and Chronic Schizophrenia. Pharmacopsychiatry. 2020;53:21–29 [↑](#endnote-ref-32)
33. Schoemaker JH, Jansen WT, Schipper J, Szegedi A. The selective glycine uptake inhibitor org 25935 as an adjunctive treatment to atypical antipsychotics in predominant persistent negative symptoms of schizophrenia: results from the GIANT trial. J Clin Psychopharmacol. 2014;34:190–198 [↑](#endnote-ref-33)
34. Shoja Shafti S, Akbari S. Intractability of Deficit Syndrome of Schizophrenia Against Adjunctive Modafinil. J Clin Psychopharmacol. 2016;36:45–49 [↑](#endnote-ref-34)
35. Stauffer VL, Millen BA, Andersen S, Kinon BJ, Lagrandeur L, Lindenmayer JP, Gomez JC. Pomaglumetad methionil: no significant difference as an adjunctive treatment for patients with prominent negative symptoms of schizophrenia compared to placebo. Schizophr Res. 2013 Nov;150(2-3):434-41 [↑](#endnote-ref-35)
36. Sum MY, Tay KH, Sengupta S, Sim K. Neurocognitive functioning and quality of life in patients with and without deficit syndrome of schizophrenia. Psychiatry Res. 2018 May;263:54-60 [↑](#endnote-ref-36)
37. Valiengo LDCL, Goerigk S, Gordon PC, Padberg F, Serpa MH, Koebe S, Santos LAD, Lovera RAM, Carvalho JB, van de Bilt M, Lacerda ALT, Elkis H, Gattaz WF, Brunoni AR. Efficacy and Safety of Transcranial Direct Current Stimulation for Treating Negative Symptoms in Schizophrenia: A Randomized Clinical Trial. JAMA Psychiatry. 2020 Feb 1;77(2):121-129 [↑](#endnote-ref-37)
38. Walling D, Marder SR, Kane J, Fleischhacker WW, Keefe RS, Hosford DA, Dvergsten C, Segreti AC, Beaver JS, Toler SM, Jett JE, Dunbar GC. Phase 2 Trial of an Alpha-7 Nicotinic Receptor Agonist (TC-5619) in Negative and Cognitive Symptoms of Schizophrenia. Schizophr Bull. 2016 Mar;42(2):335-43 [↑](#endnote-ref-38)
